# Supplementary material
Source: PubMed Central journal article supplement (PMC6698138)
Supplement: NIHMS1013538-supplement-Suppl_Material.pdf [file NIHMS1013538-supplement-Suppl_Material.pdf]

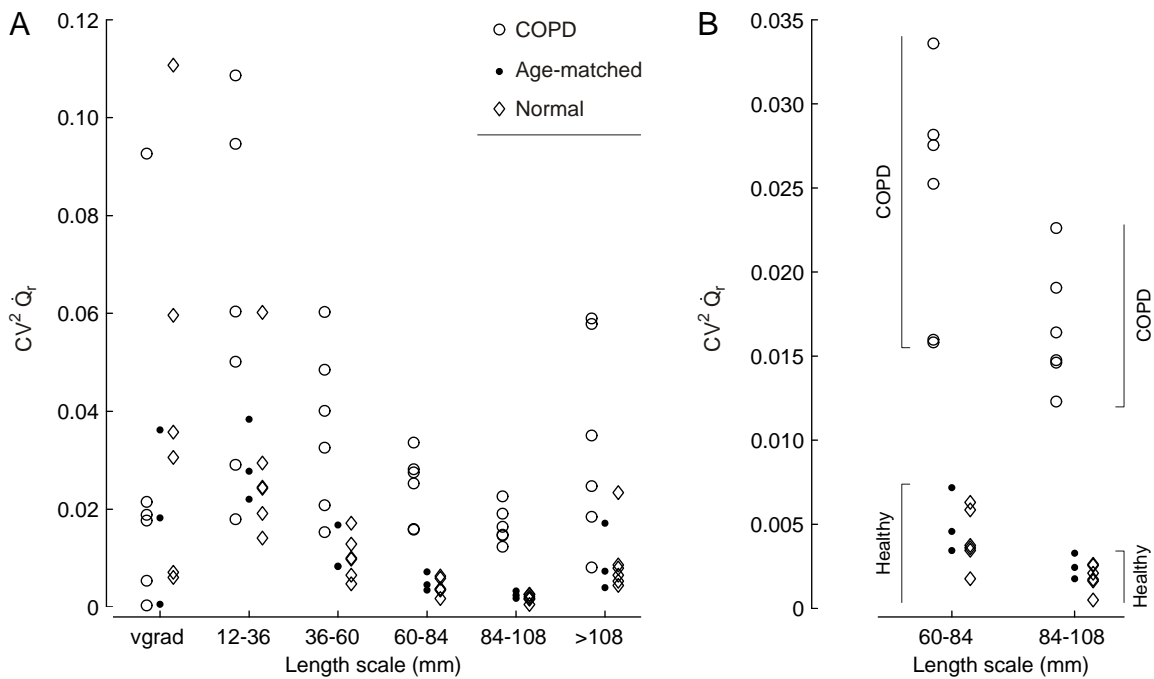

**SUPPLEMENTAL FIGURE 1.** Detailed visualization of squared coefficients of variation of regional mean normalized perfusion ( $CV^2 P_r$ ). **(A)** Overview of  $CV^2 P_r$  including all length scale ranges and the vertical gradient (vgrad) for all three groups studied. **(B)** Detail of the  $CV^2 P_r$  distribution at two selected length scale ranges showing a remarkable separation between COPD and healthy subjects.
